# Supplementary material for: Simultaneous quantification of Escherichia coli O157:H7 and Shigella boydii using a visual-antibody-macroarray
Source: Royal Society of Chemistry journal article supplement (doi:10.1039/c5an01035g), 2015-01-01
Supplement: c5an01035g1.pdf [file c5an01035g1.pdf]

Simultaneous quantification of *Escherichia coli* O157:H7 and *Shigella boydii* using visual-antibody-macroarray

Man Wu<sup>a §</sup>, Haolin Li<sup>a §</sup>, Yinghui Jiang<sup>b</sup>, Chunmei Song<sup>a</sup>, Huiqin Guo<sup>a</sup>, Shuyan Wu<sup>a</sup>,  
Cheng Liu<sup>a</sup>, Jianwu Li<sup>a</sup>, Haijuan Zeng<sup>a</sup>, Xuzhao Zhai<sup>a</sup>, Weisheng zhang<sup>c\*</sup>, Enguo  
Fan<sup>d\*</sup>, Qing Liu<sup>a\*</sup>

*§ These authors contributed to the work equally and should be regarded as co-first authors*

*\* Co-corresponding authors*

*<sup>a</sup> School of medical instrument and Food Engineering, University of Shanghai for Science and Technology, Shanghai200093, China. Tel: +86 (21) 65710368; E-mail: liuq@usst.edu.cn*

*<sup>b</sup> The Food and Agricultural Products Testing Agency, Shandong Entry-exit Inspection and Quarantine Bureau of China, Qingdao 266002, China*

*<sup>c</sup> Anorectal department of Gansu provincial hospital, Lanzhou 730000,China. E-mail: zh9189@sina.com*

*<sup>d</sup> Institute of Biochemistry and Molecular Biology, ZBMZ, University of Freiburg, 79104 Freiburg, Germany. E-mail: [enguo.fan@biochemie.uni-freiburg.de](mailto:enguo.fan@biochemie.uni-freiburg.de)*

**Table S.1** Standard strains for experiment

ATCC: American type culture collection

CICC: China center of industrial culture collection

CMCC: China general microbiological culture collection center

| Standard strains               | Sources                                               | Serial number |
|--------------------------------|-------------------------------------------------------|---------------|
| <i>Staphylococcus aureus</i>   | ATCC                                                  | 29213         |
| <i>Listeria monocytogenes</i>  | ATCC                                                  | 13932         |
| <i>Listeria monocytogenes</i>  | ATCC                                                  | 19112         |
| <i>Listeria monocytogenes</i>  | ATCC                                                  | 19114         |
| <i>Listeria monocytogenes</i>  | ATCC                                                  | 19116         |
| <i>Listeria monocytogenes</i>  | ATCC                                                  | 19117         |
| <i>Listeria monocytogenes</i>  | ATCC                                                  | 19115         |
| <i>Salmonella choleraesuis</i> | CICC                                                  | 21493         |
| <i>Salmonella typhimurium</i>  | CICC                                                  | 22956         |
| <i>Salmonella typhimurium</i>  | ATCC                                                  | 14028         |
| <i>Salmonella enteritidis</i>  | ATCC                                                  | 13076         |
| <i>Shigella flexneri</i>       | ATCC                                                  | 12022         |
| <i>Shigella sonnei</i>         | ATCC                                                  | 25913         |
| <i>Shigella dysenteriae</i>    | Zhuhai Entry-Exit Inspection and<br>Quarantine Bureau |               |
| <i>Vibrio parahaemolyticus</i> | ATCC                                                  | 17802         |
| <i>Enterobacter sakazakii</i>  | ATCC                                                  | 29004         |

|                                 |      |       |
|---------------------------------|------|-------|
| <i>Enterobacter sakazakii</i>   | ATCC | 29554 |
| <i>Enterobacter sakazakii</i>   | ATCC | 12868 |
| <i>Yersinia enterocolitica</i>  | ATCC | 23715 |
| <i>Yersinia enterocolitica</i>  | CMCC | 52207 |
| <i>Escherichia coli</i> O157:H7 | ATCC | 43895 |
| <i>Escherichia coli</i> O157:H7 | ATCC | 43889 |
| <i>Shigella boydii</i>          | ATCC | 9207  |

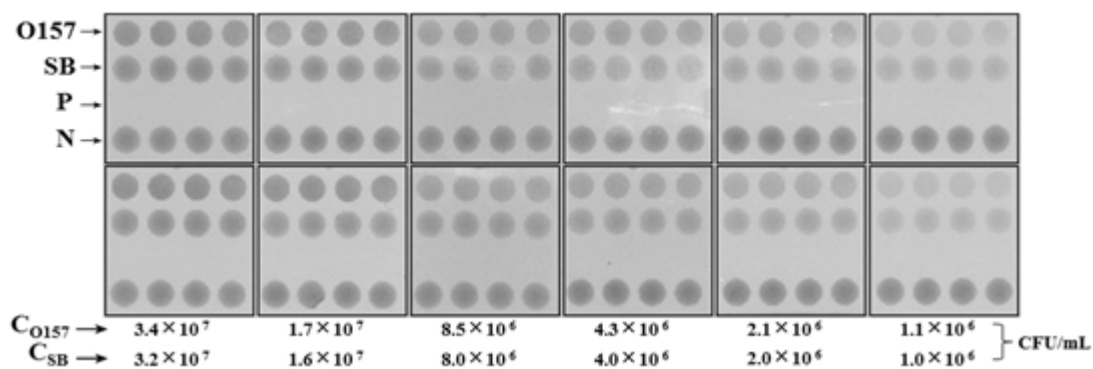

**Fig. S.1** Other twice duplicate experiment results of standard curve fitting, made a gray value analysis for each spot about the three times duplicate experiment, in different bacteria liquids concentration, variation coefficient of three average signal values in each group were shown in Table .S.2, of which the maximum was 1.86%, less than 10% inter-assay CV of conventional ELISA experiment, so the stability and reproducibility of standard curves was adequate.

**Table .S.2** Variation coefficient of three average signal values in each group.

BLC: Bacteria liquids concentration.

ASV: Average signal values.

CV: Coefficient of variation.

|                                 |        | BLC<br>(CFU/mL)     |                     |                     |                     |                     |                     |
|---------------------------------|--------|---------------------|---------------------|---------------------|---------------------|---------------------|---------------------|
|                                 |        | 1.1×10 <sup>6</sup> | 2.1×10 <sup>6</sup> | 4.3×10 <sup>6</sup> | 8.5×10 <sup>6</sup> | 1.7×10 <sup>7</sup> | 3.4×10 <sup>7</sup> |
| <i>Escherichia coli</i> O157:H7 | ASV 1  | 62                  | 69.75               | 74.75               | 80.5                | 81.5                | 85                  |
|                                 | ASV 2  | 61.75               | 68.5                | 74.25               | 77.75               | 82.25               | 85.5                |
|                                 | ASV 3  | 61                  | 69.25               | 72.25               | 78.25               | 81.75               | 85.5                |
|                                 | CV (%) | 0.85                | 0.96                | 1.79                | 1.86                | 0.47                | 0.47                |
|                                 |        | BLC<br>(CFU/mL)     |                     |                     |                     |                     |                     |
|                                 |        | 1.0×10 <sup>6</sup> | 2.0×10 <sup>6</sup> | 4.0×10 <sup>6</sup> | 8.0×10 <sup>6</sup> | 1.6×10 <sup>7</sup> | 3.2×10 <sup>7</sup> |
| <i>Shigella boydii</i>          | ASV 1  | 70                  | 74                  | 79.75               | 83.25               | 86.5                | 91                  |
|                                 | ASV 2  | 70.25               | 74.5                | 78.25               | 82.5                | 87.25               | 91.75               |
|                                 | ASV 3  | 69                  | 74.75               | 78.25               | 82.25               | 87.75               | 92.5                |
|                                 | CV (%) | 0.95                | 0.51                | 1.10                | 0.63                | 0.72                | 0.82                |
